# Supplementary material for: Computational discovery of two-dimensional tetragonal group IV–V monolayers
Source: Royal Society of Chemistry journal article supplement (doi:10.1039/d4ra06623e), 2024-01-01
Supplement: d4ra06623e1.pdf [file d4ra06623e1.pdf]

## **Supplementary materials for “Computational discovery of two-dimensional tetragonal group IV-V monolayers”**

Qiubao Lin<sup>1</sup>, Jungang Huang<sup>1</sup>, Yimei Fang<sup>1,\*</sup>, Feng Zheng<sup>1</sup>, Kaixuan Chen<sup>2</sup>,  
Shunqing Wu<sup>3,\*</sup>, Zi-Zhong Zhu<sup>3,4</sup>

<sup>1</sup>School of Science, Jimei University, Xiamen 361021, China

<sup>2</sup>Xiamen Changelight Co., Ltd. 361101, Xiamen, China

<sup>3</sup>Department of Physics, OSED, Key Laboratory of Low Dimensional Condensed Matter Physics  
(Department of Education of Fujian Province), Xiamen University, Xiamen 361005, China

<sup>4</sup>Fujian Provincial Key Laboratory of Theoretical and Computational Chemistry, Xiamen 361005,  
China

\*Email: ymfang@jmu.edu.cn, wsq@xmu.edu.cn

### **Content**

**Fig. S1 The AIMD simulation results of the total energy of Td4-phase group IV-V monolayers.**

**Fig.S2 The elemental- and orbital-resolved density of states of group IV-V monolayers.**

**Fig.S3 Top and Side views of the optimized 2D hydrogenated group IV-V monolayers.**

**Fig.S4 The AIMD simulation results of 2D hydrogenated group IV-V monolayers.**

**Fig.S5 Band structures of hydrogenated group IV-V monolayers in the Td4 structure calculated with the HSE functional with SOC.**

**Fig.S6 The elemental- and orbital-resolved DOS of Td4-phase SiP monolayer and hydronated SiP monolayer.**

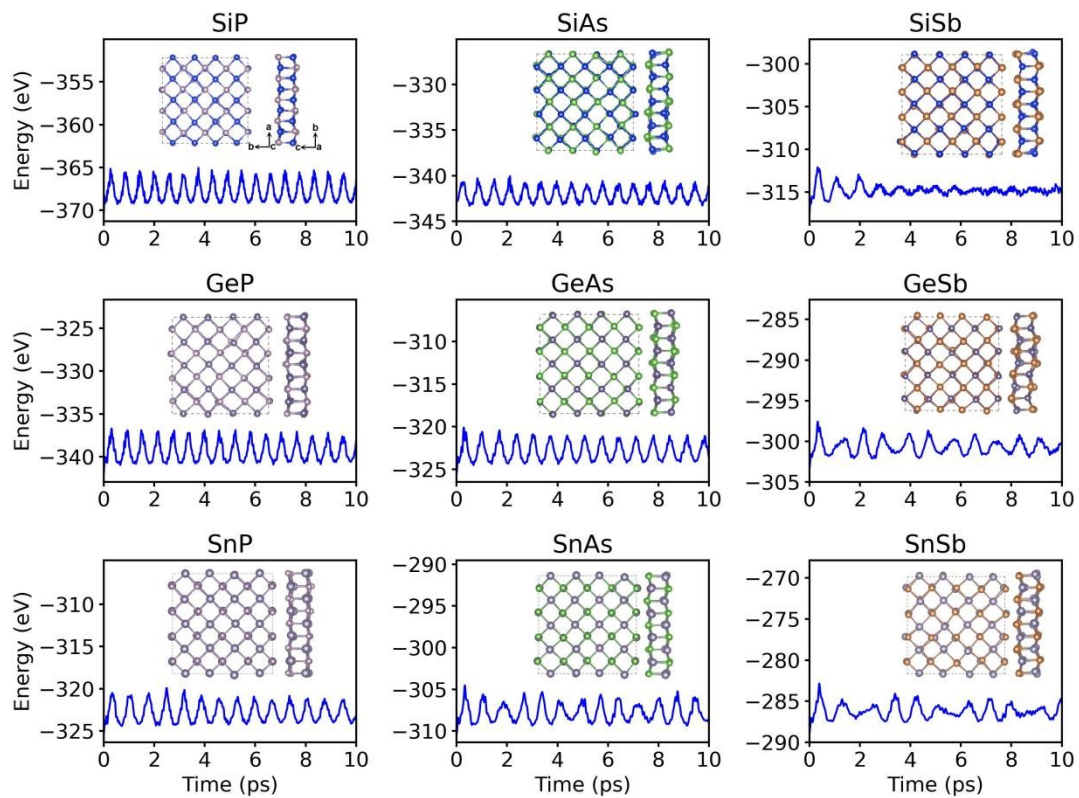

Fig.S1 The fluctuations of the total energy of Td4-phase group IV-V monolayers during the AIMD simulations at 300K; the insets show the final structures of the 2D group IV-V monolayers at the end of the simulation.

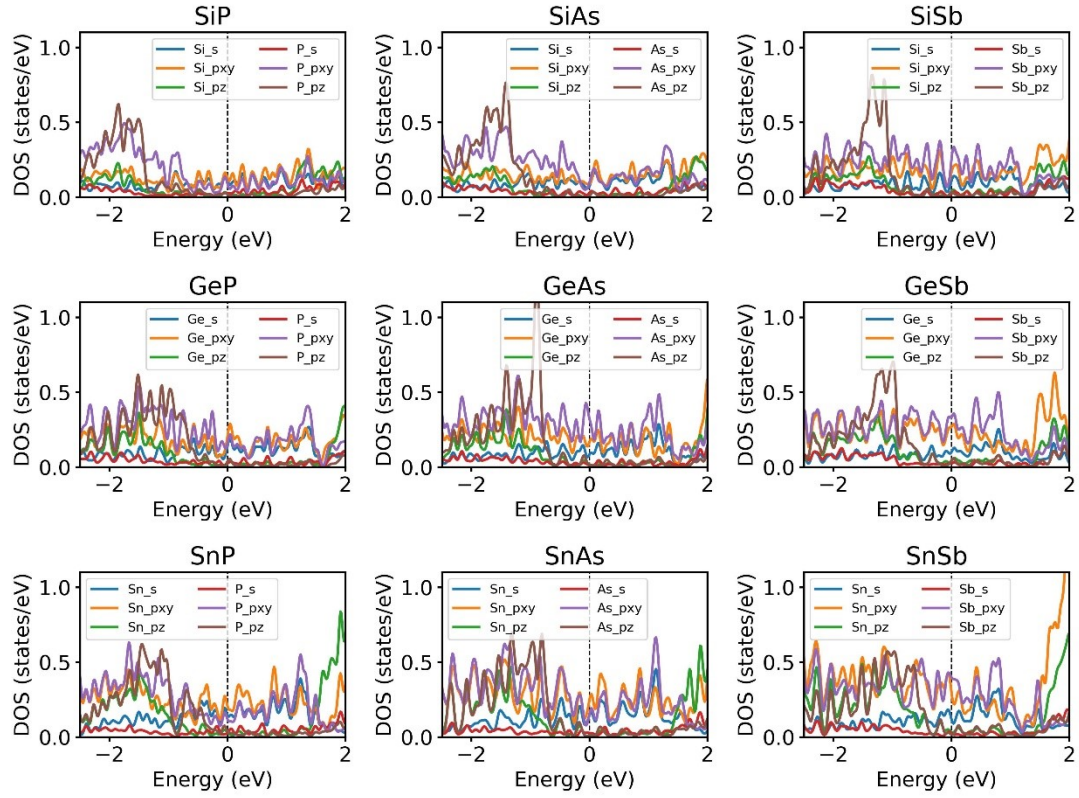

Fig. S2 The elemental- and orbital-resolved density of states (DOS) of group IV-V monolayers.

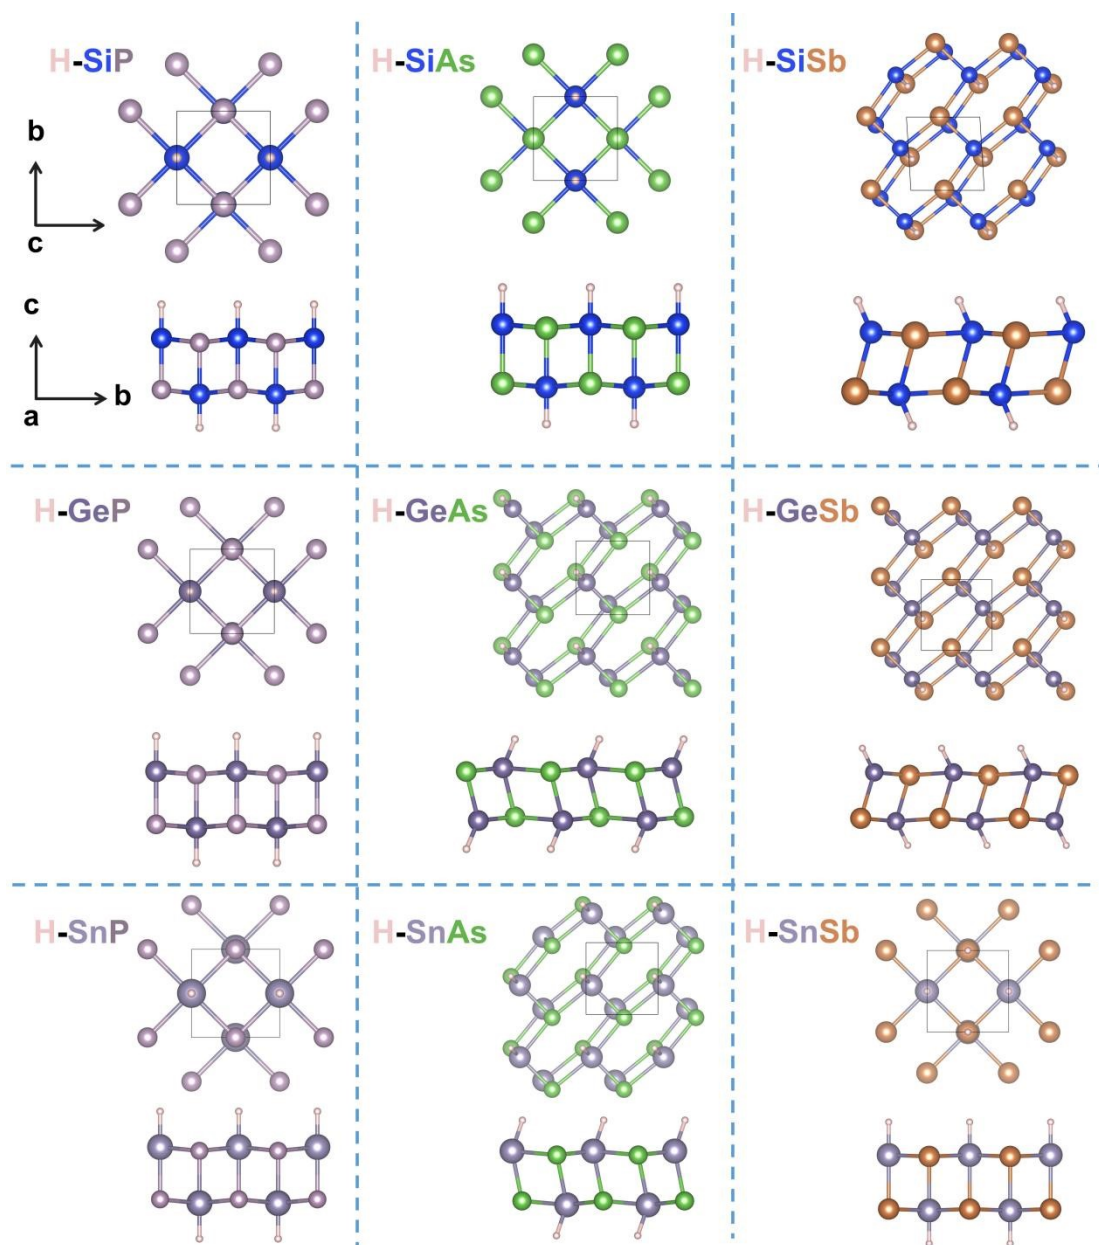

Fig. S3 Top and Side views of the optimized 2D hydrogenated group IV-V monolayers.

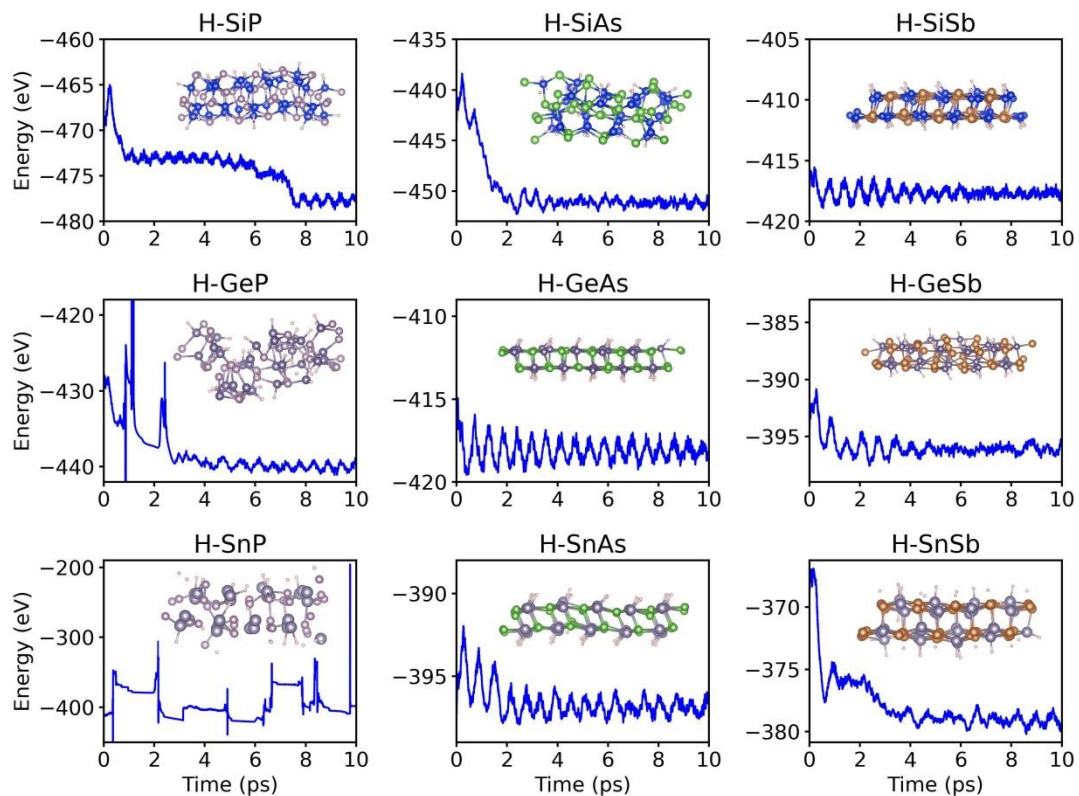

Fig.S4 The fluctuations of the total energy of 2D hydrogenated group IV-V monolayers during the AIMD simulations at 300K; the insets show the side views of the final structures at the end of the simulation.

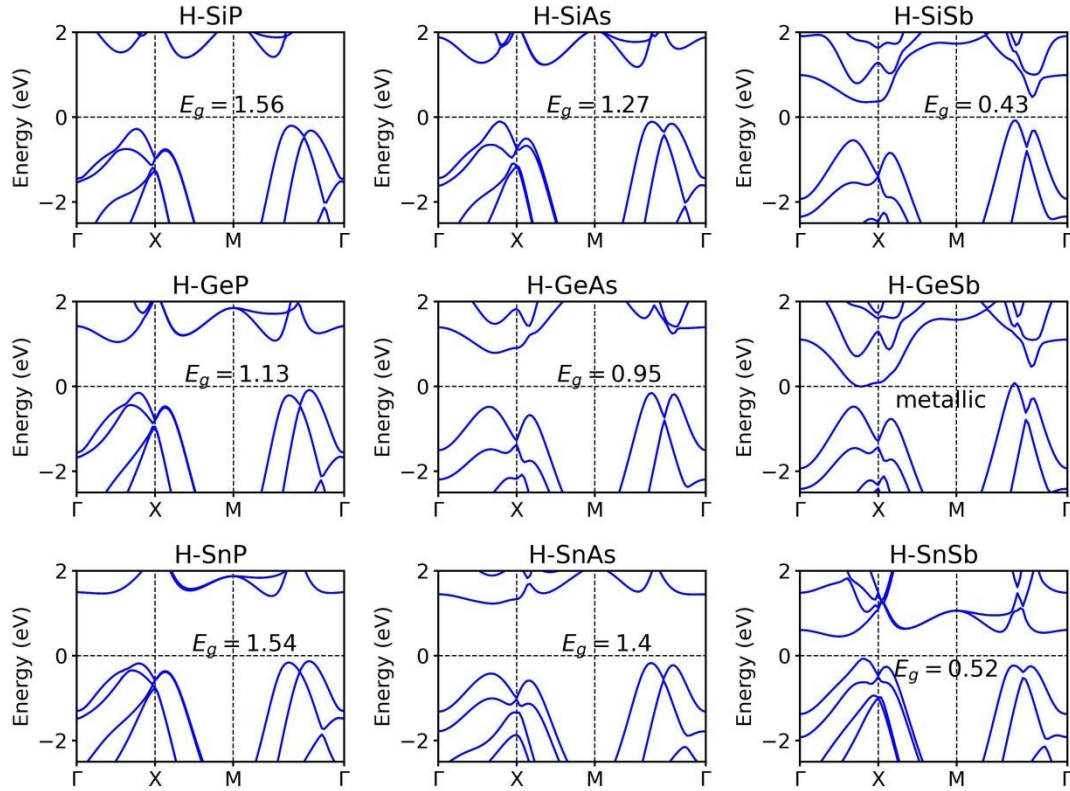

Fig. S5 Band structures of hydrogenated group IV-V monolayers in the Td4 structure calculated with the HSE functional with SOC.

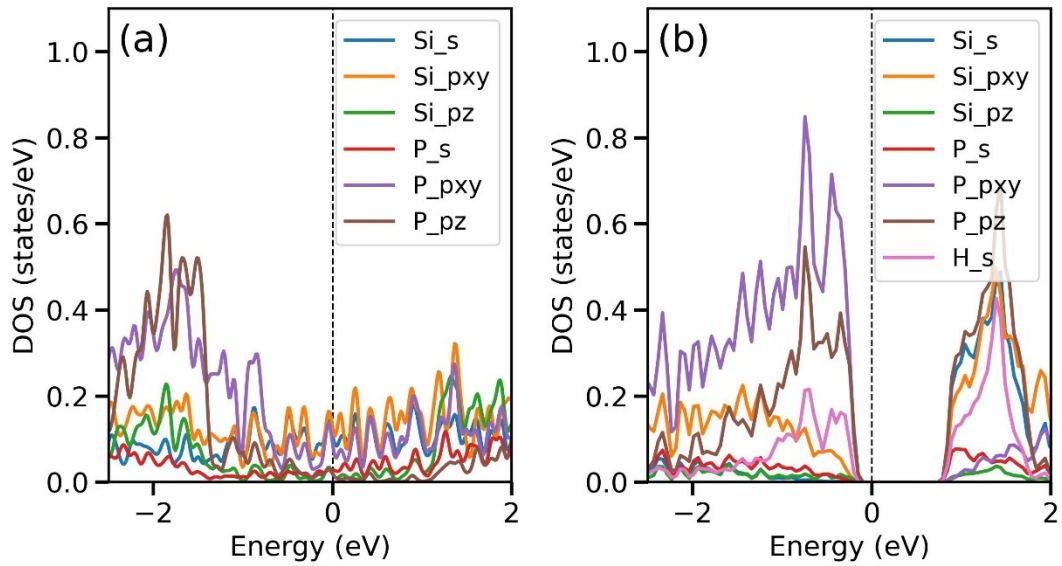

Fig. S6 The elemental- and orbital-resolved DOS of Td4-phase SiP monolayer and hydrogenated SiP monolayer.
